# Supplementary material
Source: Springer Nature journal article supplement (https://www.springermedizin.de/resource/supplementary/12967_2013_1546_MOESM4_ESM.pdf/9574316)

# pGEM constructs

---

Survivin full length

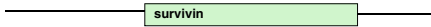

Ubi-survivin full length

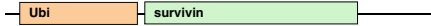

Mini-survivin

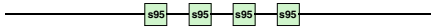

Ubi-mini-survivin

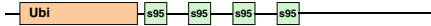

Supplement: MOESM4 [file 9574316]
